# Supplementary material for: Reproducible research policies and software/data management in scientific computing journals: a survey, discussion, and perspectives
Source: Frontiers journal article supplement (doi:10.3389/fcomp.2024.1491823), 2025-01-15
Supplement: Data_Sheet_1.pdf [file Data_Sheet_1.pdf]

SUPPLEMENTARY MATERIAL

7 RESEARCH METHODS

7.1 PRISMA Literature Review

We adopted two strategies Salvador Oliván et al. (2023) to conduct our survey. On the one hand, active search for articles highly cited reports, and follow-up of citation threads on computational reproducibility. On the other hand, we applied the PRISMA 2020 Haddaway et al. (2022) methodology with the SCOPUS & WoS databases between 2020 to the present day (Table 6). Eventually, we reduced our analysis to 100 representative works. Figure 9 shows the overall flow.

| PRISMA             |              |                                                                                                                                                                                                                                                                    |
|--------------------|--------------|--------------------------------------------------------------------------------------------------------------------------------------------------------------------------------------------------------------------------------------------------------------------|
| Step               | Num items    | Condition/ Query                                                                                                                                                                                                                                                   |
| Identification     | SCOPUS (413) | TITLE ( reproducibility ) AND PUB-YEAR > 2019 AND PUBYEAR < 2024 AND ( LIMIT-TO ( SUBJAREA , "COMP" ) )                                                                                                                                                            |
| Identification     | WoS (371)    | TI=(reproducibility) and 2023 or 2022 or 2021 or 2020 (Publication Years) and Multidisciplinary Sciences or Computer Science Interdisciplinary Applications or Computer Science Theory Methods or Computer Science Information Systems (Web of Science Categories) |
| Deleting re-peated | (144)        | Repeated articles                                                                                                                                                                                                                                                  |
| Screening          | (80)         | Main theme reproducibility                                                                                                                                                                                                                                         |
| Included           | (60)         | Systematically classified                                                                                                                                                                                                                                          |

**Table 6.** The PRISMA screening was used in this review to select recent relevant articles related to reproducibility in scientific research.

7.2 Journals Survey

To avoid bias in the research and not only address journals that are known to apply reproducibility policies, e.g. IEEE with CodeOcean<sup>50</sup>, ACM with reproducibility Badges<sup>51</sup>, Journal Nature<sup>52</sup>, a request for participation was sent to several journals specialized in computer science.

Information was voluntarily requested through a 16-question form from a list of 500 journals specialized in computer science and Scopus indexed from Q1 to Q4 in the period from July 1, 2023, to September 1, 2023. Although some of the questions were very precise, they were left open to comments.

<sup>50</sup> <https://innovate.ieee.org/ieee-code-ocean/>  
<sup>51</sup> <https://www.acm.org/publications/policies/artifact-review-badging>  
<sup>52</sup> <https://www.nature.com/nature-portfolio/editorial-policies/reporting-standards>

| Tool                               | Neptune                           | Weights & Biases                  | Comet                             | Secord & Omni board | MLflow            | Tensor Board | Guild AI            | Polyaxon            | ClearML      | Valdai              | Pachyderm           | Kubeflow | Verta.ai                | SageMaker           | DFC                              |
|------------------------------------|-----------------------------------|-----------------------------------|-----------------------------------|---------------------|-------------------|--------------|---------------------|---------------------|--------------|---------------------|---------------------|----------|-------------------------|---------------------|----------------------------------|
| Focus                              | MediaStor, Track, ModReg          | Exp Manage                        | Exp Manage                        | Exp Manage          | Entire Life cycle | Exp Manage   | Exp Manage          | Exp Manage          | Exp Manage   | Entire Life cycle   | Entire Life cycle   | Run tion | Entire Life cycle       | Entire Life cycle   | Data Versioning                  |
| Price                              | Ind: Free, Acad: Free, Team: Paid | Ind: Free, Acad: Free, Team: Paid | Ind: Free, Acad: Free, Team: Paid | Free                | Free              | Free         | Free                | Free                | Free or Paid | Free                | Free                | Free     | Open-source: Free, Paid | Extra cost          | DFC: Free, DVC Studio: Free/Paid |
| Web UI or Console-based?           | Web UI                            | Web UI                            | Web UI                            | Web UI              | Web UI            | Web UI       | Both CLI and Web UI | Both CLI and Web UI | Web UI       | Both Web UI and CLI | Both Web UI and CLI | Web UI   | Web UI                  | Both Web UI and CLI | Both Web and Console UI          |
| Code Versions                      |                                   |                                   |                                   | Limited             | Limited           |              | Limited             | Limited             | Limited      | Limited             |                     | Limited  | x                       |                     | x                                |
| Metrics and Losses                 | x                                 | x                                 | x                                 | Limited             | x                 | Limited      | Limited             | Limited             | Limited      | Limited             |                     | x        | x                       | x                   | Limited                          |
| Images                             | x                                 | Limited                           | N/A                               |                     |                   |              |                     | Limited             | x            |                     |                     | N/A      |                         |                     |                                  |
| Audio                              | x                                 | x                                 | x                                 |                     |                   | x            |                     | x                   | x            |                     | N/A                 |          |                         |                     |                                  |
| Video                              | x                                 | x                                 |                                   |                     |                   |              |                     | x                   | x            |                     | N/A                 |          |                         |                     |                                  |
| One-command Experiment Re-run      |                                   |                                   |                                   |                     | x                 |              | Limited             | x                   | x            | x                   | N/A                 | N/A      |                         |                     | x                                |
| Experiment Lineage                 |                                   | x                                 | Limited                           |                     |                   |              |                     | Limited             |              | x                   | x                   | Limited  |                         |                     |                                  |
| Environment Versioning             | x                                 | x                                 | x                                 |                     | x                 |              | x                   | x                   | x            | x                   | N/A                 | N/A      |                         |                     | x                                |
| Saving/ Fetching/ Caching Datasets |                                   |                                   |                                   |                     |                   |              | Limited             |                     | x            | x                   | N/A                 | N/A      |                         |                     | x                                |
| Comparing Experiments              |                                   |                                   |                                   |                     |                   |              |                     |                     | x            | Limited             |                     |          |                         |                     |                                  |
| Table Format Diff                  | x                                 | x                                 | x                                 |                     |                   |              | x                   |                     | x            |                     |                     |          |                         |                     | x                                |
| Overlaid Learning Curves           | x                                 | x                                 | x                                 | x                   | x                 | x            |                     | x                   | x            | x                   |                     |          |                         | x                   | x                                |
| Code                               | Limited                           | Limited                           |                                   | Limited             |                   |              | Limited             |                     | x            |                     |                     |          |                         |                     | x                                |

**Table 7.** Reproducibility Benchmark of MLOps Tools <https://neptune.ai/> (2021). This table shows benchmarks for different popular Data/Model lifecycle management tools.

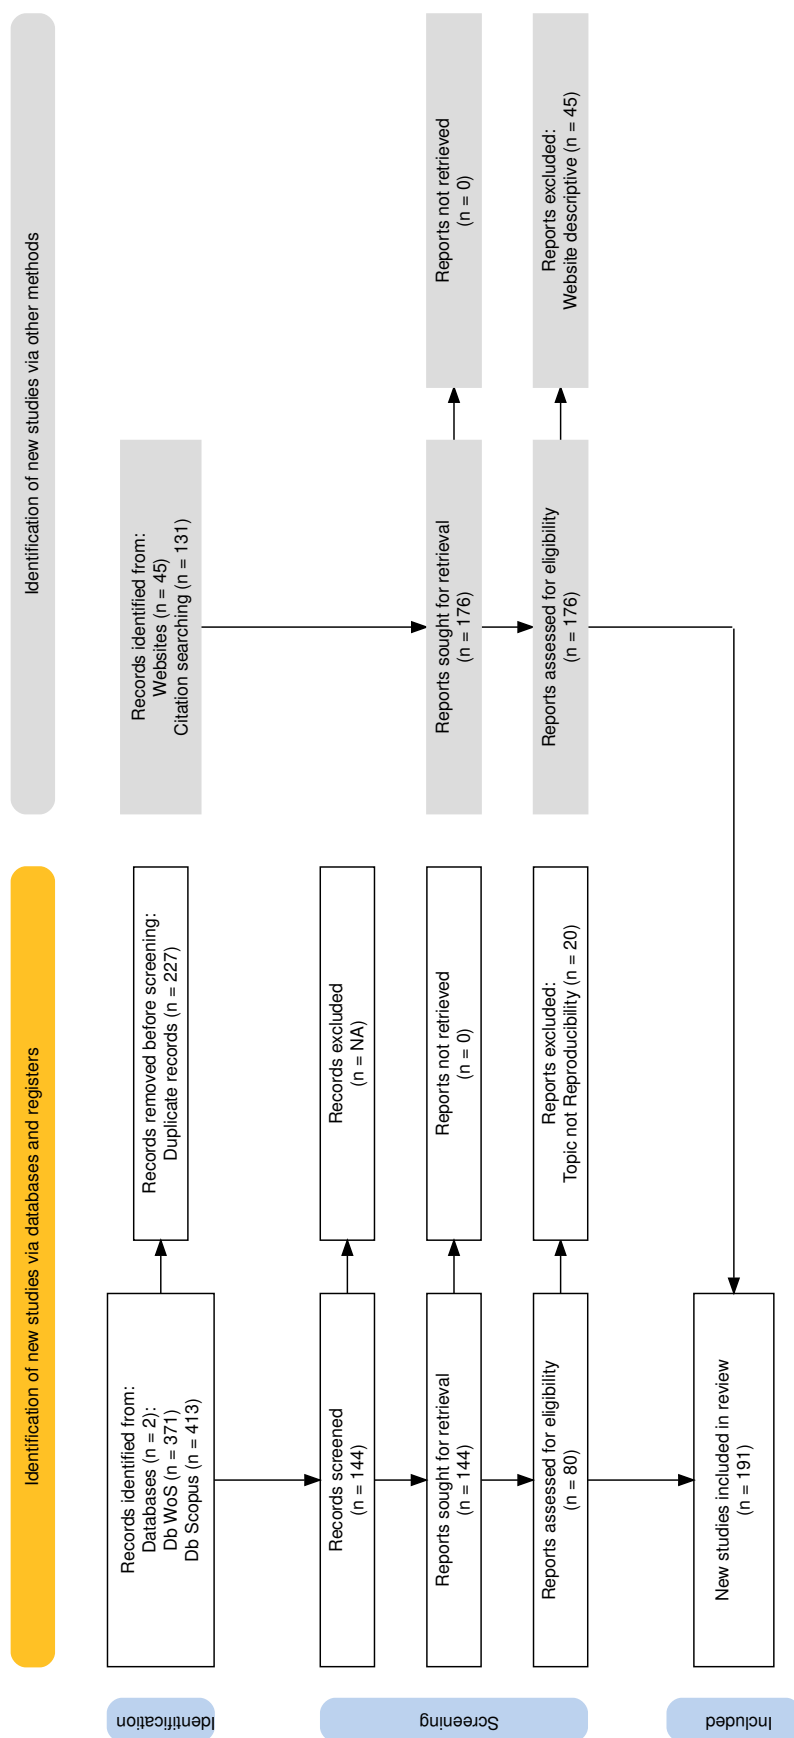

Figure 9. PRISMA flow diagram.
